# Supplementary material for: Bioinspired self-cleaning surface with microflower-like structures constructed by electrochemically corrosion mediated self-assembly
Source: Royal Society of Chemistry journal article supplement (doi:10.1039/d1ce01267c), 2021-12-24
Supplement: d1ce01267c2.pdf [file d1ce01267c2.pdf]

## Supporting Information

### **Bioinspired self-cleaning surface with microflower-like structures constructed by electrochemically corrosion mediated self-assembly**

Yulan Bao,<sup>a,1</sup> Wenna Fu,<sup>a,1</sup> Hui Xu,<sup>a</sup> Yuxin Chen,<sup>a</sup> Hua Zhang,<sup>a,\*</sup> and Shuiliang Chen<sup>a,\*</sup>

<sup>a</sup> College of Chemistry and Chemical Engineering, Jiangxi Normal University, Nanchang, Jiangxi  
330022, P.R. China.

<sup>1</sup> These authors contributed equally.

\*Corresponding authors.

H.Z. Email: hzhang911220@gmail.com; S.C. Email: slchenjxnu@jxnu.edu.cn

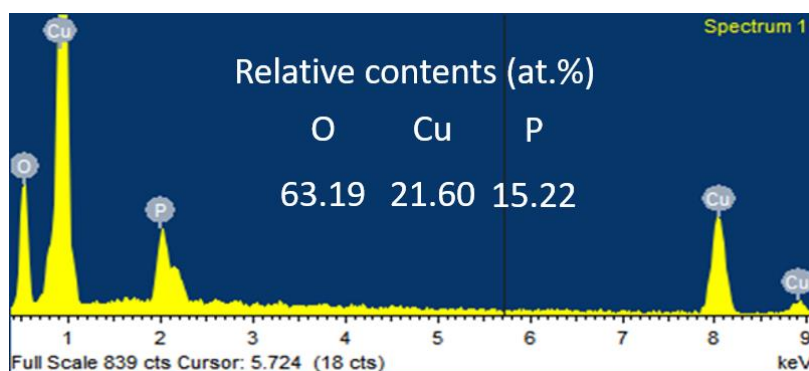

**Figure S1.** Typical EDS pattern of the microflower-like structures. The inset are the relative contents of O, Cu and P elements, respectively. The atom ratio of Cu/P is calculated to be about 1.4:1, close to that of  $\text{Cu}_3(\text{PO}_4)_2$ .

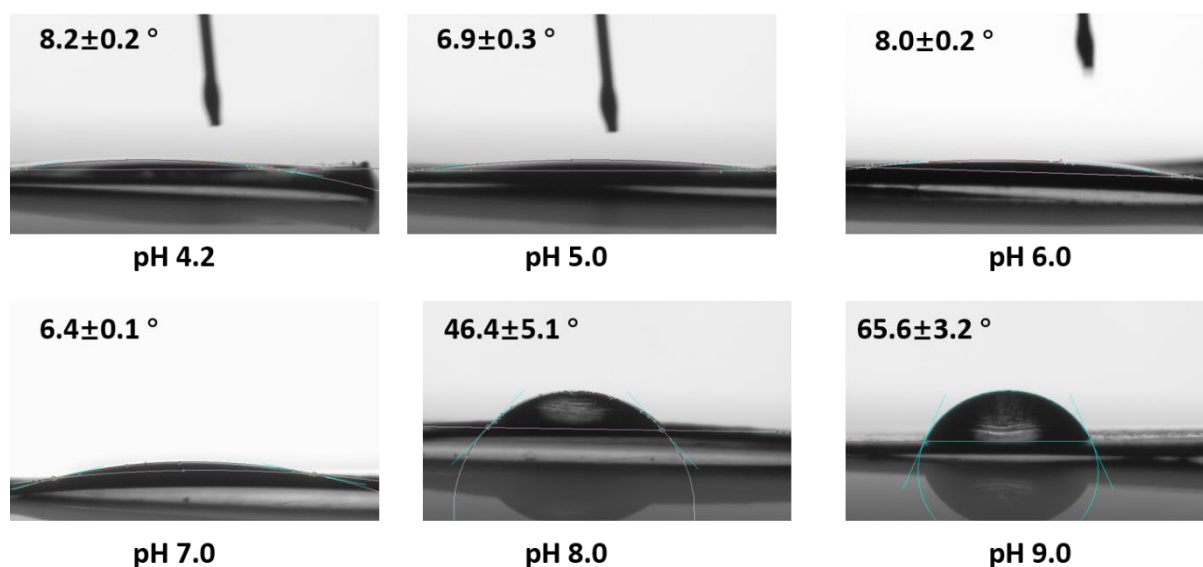

**Figure S2.** Captured photos of water droplet on the surfaces prepared at different pH values. (Phosphate concentration: 50 mM; applied potential: 0.2 V; reaction time: 2 h)

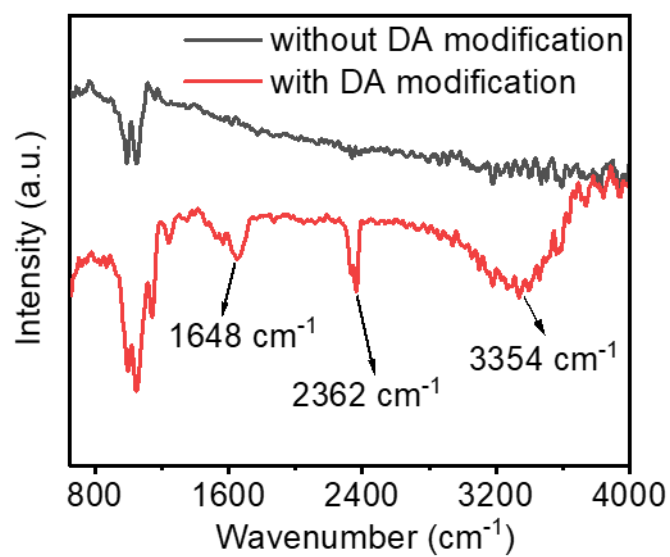

**Figure S3.** FTIR spectra of microflower-like surfaces before and after DA modification.

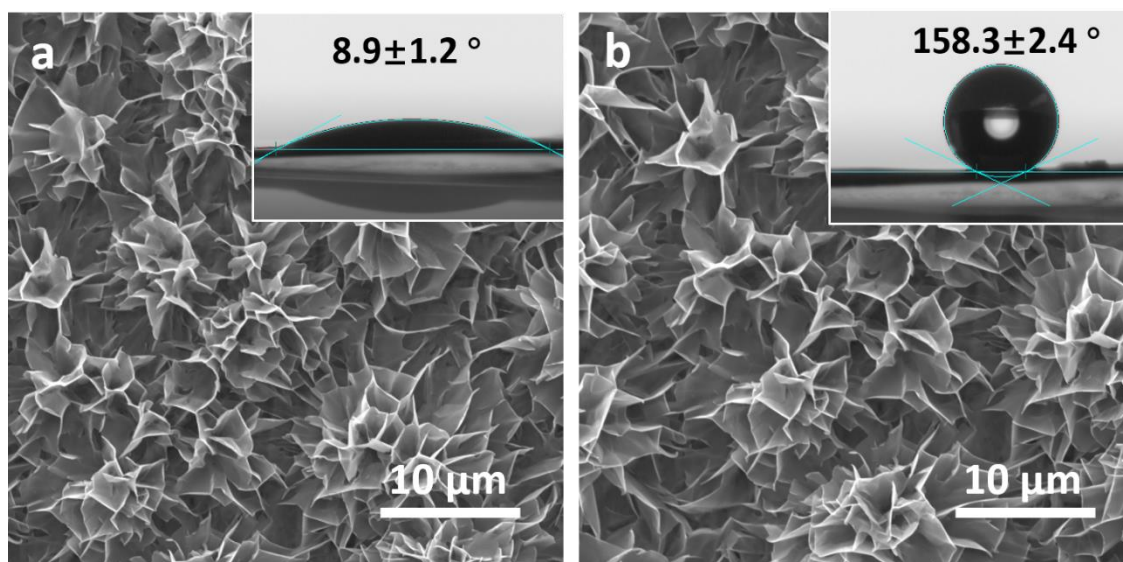

**Figure S4.** SEM images of the microflower-like surfaces after (a) ethanol treatment and (b) DA re-coating.

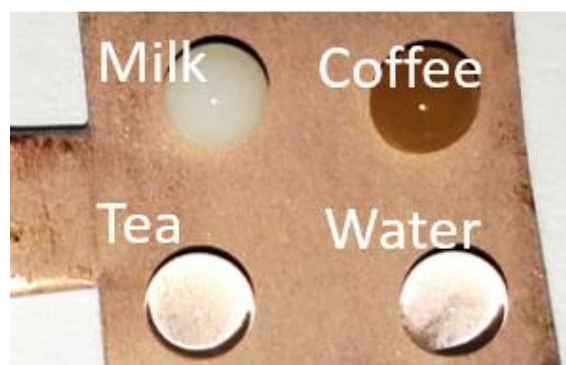

**Figure S5.** Photograph of various common liquid droplets in our daily life on the microflower-like superhydrophobic surface. indicating that the microflower-like surface possesses a strong resistance to the contaminant.
